1 **Inhibition of phosphodiesterase - 10A by Papaverine protects human cortical neurons**  
2 **from quinolinic acid induced oxidative stress and synaptic proteins alterations**

3

4 Abid Bhat<sup>1,2</sup>, Vanessa Tan<sup>2</sup>, Benjamin Heng<sup>2</sup>, Musthafa M. Essa<sup>3,4</sup>, Saravana B.  
5 Chidambaram<sup>1,5\*</sup>, Gilles J. Guillemin<sup>2\*</sup>

6 <sup>1.</sup> Department of Pharmacology, JSS College of Pharmacy, JSS Academy of Higher  
7 Education & Research, Sri Shivarathreshwara Nagar, Mysuru, Karnataka 570015, India

8 <sup>2.</sup> Neuroinflammation Group, Faculty of Medicine, Health and Human Sciences, Macquarie  
9 University, Sydney, NSW, Australia.

10 <sup>3.</sup> Department of Food Science and Nutrition, CAMS, Sultan Qaboos University, Muscat,  
11 Oman

12 <sup>4.</sup> Ageing and Dementia Research Group, Sultan Qaboos University, Muscat, Oman

13 <sup>5.</sup> Centre for Experimental Pharmacology and Toxicology, Central Animal Facility, JSS  
14 Academy of Higher Education & Research, Mysuru, India

15

16 **For correspondence**

17 **Prof Gilles J. Guillemin**

18 Head of the Neuroinflammation group

19 Faculty of Medicine and Health Sciences

20 Macquarie University NSW, 2109 Australia

21 Phone: 61 (02) 9850 2727. Email: [gilles.guillemin@mq.edu.au](mailto:gilles.guillemin@mq.edu.au)

22 &

23 **Prof. Saravana Babu Chidambaram**

24 Associate Professor, Department of Pharmacology

25 JSS College of Pharmacy & Coordinator, CPT, JSS AHER,

26 Mysuru, Karnataka 570015, India

27 Mob: +91-904222227. Email: [babupublications@gmail.com](mailto:babupublications@gmail.com)

28

29

30

31 **Abstract**

32 Phosphodiesterase-10A (PDE10A) hydrolyse the secondary messengers cGMP and cAMP  
33 which play critical role in neurodevelopment and brain functions. PDE10A is linked to  
34 progression of neurodegenerative diseases like Alzheimer's, Parkinson's, Huntington's  
35 diseases etc and a critical role in cognitive functions. The present study was undertaken to  
36 determine the possible neuroprotective effects and the associated mechanism of papaverine  
37 (PAP) against quinolinic acid (QUIN) induced excitotoxicity using human primary cortical  
38 neurons. Cytotoxicity potential of PAP was analysed using MTS assay. Reactive oxygen  
39 species (ROS) and mitochondrial membrane potential were measured by DCF-DA and JC10  
40 staining, respectively. Caspase 3/7 and cAMP levels using ELISA kits. Effect of PAP on the  
41 CREB, BDNF and synaptic proteins such as SAP-97, synaptophysin, synapsin-I, PSD-95  
42 expression was analysed by Western blotting technique. Pre-treatment with PAP increased  
43 intracellular cAMP and nicotinamide adenine dinucleotide (NAD<sup>+</sup>) levels, restored  
44 mitochondrial membrane potential ( $\Delta\Psi_m$ ), and decreased ROS and caspase3/7 content in  
45 QUIN exposed neurons. PAP up-regulated CREB and BDNF, and synaptic proteins  
46 expression. In summary, these data indicate that PDE10A involves in QUIN mediated  
47 neurotoxicity and its inhibition can elicit neuroprotection by reducing the oxidative stress and  
48 protecting synaptic proteins via upregulation of cAMP signalling cascade.

49 **Keywords:** Phosphodiesterase-10A, cAMP, papaverine, quinolinic acid, oxidative stress,  
50 synaptic proteins

51

52 **Introduction**

53 Phosphodiesterase-10A (PDE10A) is a key enzyme involved in hydrolysis of intracellular  
54 second messengers cyclic adenosine monophosphate (cAMP) and cyclic guanosine  
55 monophosphate (cGMP) in brain (Niccolini et al., 2015). cAMP activates protein kinase A  
56 (PKA), resulting in the phosphorylation of the transcription factor cAMP response element  
57 binding protein (CREB) which in turn induces the protein expression of brain-derived  
58 neurotrophic factor (BDNF) and put together these protein regulate a wide range of biological  
59 functions, such as synaptic plasticity, learning and memory etc. (Kowiański et al., 2018).  
60 Imbalance in cAMP level is implicated in the various neurodegenerative diseases (Roush et  
61 al., 2020). Dysregulation of tryptophan metabolism leads to the production of kynurenine  
62 metabolites. Quinolinic acid (QUIN) is a neuro- and gliotoxic metabolite produced in

63 kynurenine pathway (KP) (Guillemin, 2012). QUIN causes neurotoxicity by overactivation of  
64 N-methyl-D-aspartate (NMDA) receptors and by forming a coordination complex with iron  
65 and copper resulting in excessive intracellular  $Ca^{2+}$  overload (Chen et al., 2010). It triggers  
66 oxidative stress by increasing neuronal nitric oxide synthase (nNOS) and lipid peroxidation  
67 (Braidy et al., 2009a). It also impairs mitochondrial oxygen consumption and causes  
68 mitochondrial complex (I, II, III and IV) dysfunction (Mishra and Kumar, 2014). Higher  
69 levels of QUIN have been found in Alzheimer's disease (AD) (G. J. Guillemin et al., 2005),  
70 Parkinson's disease (PD) (Zinger et al., 2011), multiple sclerosis (MS) (Lim et al., 2017;  
71 Sundaram et al., 2014), Huntington's disease (HD) (Sumathi et al., 2018). QUIN exposure  
72 increases poly (ADP-ribose) polymerase (PARP) activity, depletes  $NAD^+$  and adenosine  
73 triphosphate (ATP) production in human primary neurons (Braidy et al., 2010). Depletion of  
74 ATP causes mitochondrial membrane potential ( $\Delta\psi_m$ ) collapse in turn the release of  
75 cytochrome c (cyt c) and neuronal death (Cao et al., 2011). QUIN intoxication is shown to  
76 decrease the synapse number in hippocampus region of the rat via down-  
77 regulating expression of synaptic proteins such as PSD-95 and reduced phosphorylation of  
78 CREB and BDNF expression in rats (Rahman et al., 2018).

79 Oxidative stress and excitotoxicity suppresses expression of synaptic markers such as  
80 synapsin I, synaptophysin, BDNF, calcium-calmodulin dependent protein kinases II and  
81 Calcineurin A which hinders brain development and function (Ansari et al., 2008a). PDE10A  
82 is an isoenzyme distributed in various brain regions (cerebellum, thalamus, hippocampus, and  
83 spinal cord etc); but it is highly expressed in frontal cortex (Heckman et al., 2016). Synaptic  
84 density increases in cortical regions after birth in humans (Huttenlocher and Dabholkar,  
85 1997). Interestingly, synaptic proteins are highly expressed in the cortical region and play a  
86 vital role in the cortical development (Azir et al., 2018; Valtschanoff et al., 2000). Interaction  
87 of pre and postsynaptic proteins facilitate synapse development, communication, long term  
88 potentiation and memory formation (Abraham et al., 2019). Alterations in the cortical  
89 synaptic proteome is a prominent pathological feature in AD (Counts et al., 2006). Cortical  
90 neurons are more vulnerable to ROS attacks which affect synaptic proteins as well (Ansari et  
91 al., 2008b). Studies in knockout mice suggests that PDE10A is involved in regulating basal  
92 ganglia circuit which governs motor, emotional, and cognitive functions, maintains the  
93 energy homeostasis and has a thermoregulatory role (Giampà et al., 2010; Hankir et al., 2016;  
94 Siuciak et al., 2006). Its involvement in neurological disorders such as schizophrenia  
95 (Persson et al., 2020) and HD (Giralt et al., 2013) is well documented. Papaverine (PAP), a

96 PDE10A isoenzyme inhibitor, is a major alkaloid obtained from the opium latex of *Papaver*  
97 *somniferum*, family: Papaveraceae (Han et al., 2010) (Fig.1). PAP is clinically used as a  
98 vasodilator and smooth muscle relaxant which mediates its action via cAMP (Kim et al.,  
99 2014; Wilson and White, 1986). Phosphodiesterase (PDE) inhibitors are being increasingly  
100 considered as therapeutic class for neurological disorders (Bhat et al., 2020). PAP is a potent  
101 PDE10A inhibitor with an EC<sub>50</sub> value of 36 nM, devoid of any narcotic properties and with  
102 lesser side effects as compared to PDE4 inhibitors (Boswell-Smith et al., 2006; Heckman et  
103 al., 2016). Understanding the physiological role of PDE10A and advantages of its inhibitor  
104 particularly in brain functions, in the present study we investigated the potential effects of  
105 PAP against QUIN induced neurotoxicity in human primary cortical neurons. We  
106 investigated the effects of PAP on oxidative stress, NAD<sup>+</sup>/NADH production, Caspase  
107 activity, cAMP signaling cascade and synaptic proteins expression in QUIN exposed human  
108 neurons.

## 109 **Materials and Methods**

### 110 **Reagents and antibodies**

111 Papaverine, quinolinic acid, 2',7'-dichlorofluorescein diacetate (DCFDA) were purchased from  
112 Sigma Aldrich (Castle-Hill, Australia). CellTiter 96® Aqueous One Solution cell  
113 proliferation assay kit and ApoTox-Glo™ Triplex Assay kit was obtained from Promega,  
114 Australia. JC-10 staining kit was obtained from AAT Bioquest, Australia. NAD/NADH  
115 Assay Kit, cAMP Elisa kit (ab234585), Rabbit Anti-PSD95 (ab18258), Rabbit Anti-SAP97  
116 (ab3437), Mouse Anti-Synaptophysin (ab8049), Rabbit Anti-BDNF (ab108319) were  
117 procured from Abcam, USA. Rabbit Anti-CREB, Rabbit Anti-Synapsin I was obtained from  
118 Sigma Aldrich, USA. All other reagents and chemicals used were of analytical grade.

### 119 **Primary cortical neuronal culture**

120 Human neuronal cell culture was generated from the 17- to 20-week-old foetal brain tissue  
121 collected after therapeutic termination following written informed consent obtained from the  
122 participant. Approval for this study was taken from Human Research Ethics Committee of  
123 Macquarie University (**Ethics approval: 5201300330**). The cortical neuronal cultures were  
124 prepared and maintained according to the method described by Guillemain et al. (2005b).  
125 Cells were plated in 96 well and 12-well culture plates coated with Matrigel (1/20 in  
126 Neurobasal) and maintained in Neurobasal medium supplemented with 1% B-27 supplement,  
127 1% Glutamax, 1% antibiotic/antifungal (Penicillin G 200 IU/mL, streptomycin sulphate 200

128  $\mu\text{g/mL}$ ), 0.5% HEPES buffer, and 0.5% glucose. The cells were maintained at  $37^\circ\text{C}$  in a  
129 humidified atmosphere containing 95% air/5%  $\text{CO}_2$  (Guillemin et al., 2007).

### 130 **Cell viability assay**

131 Cell viability of papaverine was evaluated using CellTiter 96® AQueous One Solution  
132 Reagent (Promega) based on mitochondrial dehydrogenase activity. Neuronal cells were  
133 seeded in Matrigel (1/20 in Neurobasal) coated 96 well plate and incubated with a range of  
134 PAP concentrations (0.5, 1, 2, 5, 10, 20  $\mu\text{M}$ ) at  $37^\circ\text{C}$  for 72 hours. Twenty microliters of [3-  
135 (4,5-dimethylthiazol-2-yl)-5-(3-carboxymethoxyphenyl)-2-(4-sulfophenyl)-2H-tetrazolium  
136 (MTS) solution was added to each well. Absorbance was read at 490 nm in a microplate  
137 reader (PHERAstar FS) at 24, 48 and 72 hours after PAP exposure.

138

### 139 **Treatment protocol**

140 Human primary neurons were pre-treated for 24 h with papaverine (2 and 5  $\mu\text{M}$ ; doses were  
141 fixed based on cytotoxicity assay results) followed by 48 hours exposure with QUIN (2  $\mu\text{M}$ )  
142 at  $37^\circ\text{C}$ .

### 143 **Reactive Oxygen Species detection using 2-7-Dichlorofluorescein Diacetate Assay**

144 Intracellular reactive oxygen species levels in primary human neurons was estimated using 2-  
145 ,7-dichlorofluorescein (DCF)-DA assay. (Kim et al., 2012). After completing the treatment,  
146 cells were washed with ice cold phosphate-buffered saline (PBS). DCF-DA (20  $\mu\text{M}$ ) was  
147 added and incubated for 30 minutes. Fluorescence intensity was measured using a microplate  
148 reader (PHERAstar FS, BMG Labtech) (excitation wavelength of 495 nm and emission  
149 wavelength of 515 nm). ROS production was calculated as a percentage of the control.

### 150 **Mitochondrial membrane potential ( $\Delta\Psi_m$ ) assessment**

151 Mitochondrial membrane potential was determined by using highly sensitive JC-10  
152 (tetraethyl benzimidazolylcarbocyanide iodine) staining as per the manufacturer's  
153 instructions (Li et al., 2016). The accumulation of the JC-10 dye is proportional to the  
154 mitochondrial membrane potential. JC-10 gives green and red to orange fluorescence in low  
155 and high  $\Delta\Psi_m$ , respectively. Following the pre-treatment with PAP, cells were washed with  
156 ice cold PBS. 100  $\mu\text{L}$  of JC-10 stain (30  $\mu\text{M}$ ) added and incubated for 20 minutes. JC-10  
157 staining in the culture media was removed and 100  $\mu\text{L}$  of HEPES buffer was added. The

158 change in fluorescence intensity was measured using microplate reader (PHERAstar FS) at  
159 Ex/Em = 490/525 nm and 540/590nm. The shift from green to red indicates depolarisation.

### 160 **Measurement of caspase 3/7 activity**

161 Caspase 3/7 activity in primary neuronal cells was measured using ApoTox-Glo Triplex  
162 Assay kit (Promega, Madison, WI, USA) as per the manufacture's instruction. Cells were  
163 treated with PAP and QUIN as mentioned in the treatment protocol. 50  $\mu$ L of caspase Glo 3/7  
164 reagent was added to each well and incubated for 2 hours at room temperature with constant  
165 shaking. Caspase 3/7 activity was analysed by measuring luminescence using a microplate  
166 reader (PHERAstar FS).

167

168

### 169 **Estimation of intracellular NAD<sup>+</sup>/NADH levels**

170 Intracellular NAD<sup>+</sup>/NADH ratio were measured using NAD/NADH Assay Kit (Abcam, Inc.,  
171 Cambridge, MA, USA) as per the instructions (Ren et al., 2010, p. 2). Cells were washed  
172 with ice cold PBS following the completion of treatment protocol. The cells were lysed with  
173 400  $\mu$ L of NAD<sup>+</sup>/NADH extraction buffer containing a cocktail of protease inhibitor (Roche  
174 Diagnostic, Castle Hill, NSW, Australia) and centrifuged at 10000 $\times$ g for 5 min at 4°C. To  
175 measure NAD<sup>+</sup>, 200  $\mu$ L aliquot of cell lysate was heat quenched at 60°C for 30 min. An  
176 equal volume of NAD<sup>+</sup>/NADH reaction mixture was added to each well with cell lysate,  
177 incubated at room temperature for 60 min, and absorbance was read at 450 nm using a  
178 microplate reader (PHERAstar FS). The concentration of NAD<sup>+</sup> or NADH was calculated  
179 using a standard calibration curve.

### 180 **Measurement of cAMP concentration**

181 Cells were seeded in 12 well plate and were pre-treated with vehicle or PAP (2 and 5  $\mu$ M) for  
182 24 hours and then exposed to QUIN (2  $\mu$ M) for 48 hours. At the end of the treatment protocol,  
183 cells were washed with ice cold PBS and lysed using 0.1 M HCl for 20 minutes and  
184 centrifuged for 10 minutes. Cell lysate was collected, and cAMP concentration was measured  
185 using a direct immunoassay kit (Abcam, MA) following the manufacturer's instruction. In  
186 brief, standards and samples were added to wells coated with an IgG antibody. A cAMP  
187 conjugated to alkaline phosphatase was then added, followed by a rabbit polyclonal antibody  
188 against cAMP. The antibody binds to cAMP in the sample or to the conjugate in a

189 competitive manner. The plate was washed, leaving only bound cAMP. para-Nitrophenyl  
190 phosphate (pNpp) substrate solution was added and produced a yellow color when catalyzed  
191 by the alkaline phosphatase on the cAMP conjugate. The stop solution was then added, and  
192 the yellow color was read at 405 nm using a microplate reader (PHERAstar FS), and  
193 concentration of cAMP was calculated using a standard calibration curve.

#### 194 **Western blot analysis**

195 Cells were lysed with radioimmunoprecipitation assay (RIPA) buffer (50 mM Tris, pH 7.4,  
196 150 mM NaCl, 1% NP-40, 5 mM EDTA, 0.5% sodium deoxycholate, 0.1% SDS, 50 nMNaF,  
197 1 mM sodium vanadate) containing a cocktail of protease inhibitor (Roche Diagnostic, Castle  
198 Hill, NSW, Australia). Total protein concentration was determined by BCA protein assay  
199 (Bio-Rad Laboratories, Hercules,CA, USA), cell lysate samples were aliquoted and stored at  
200  $-80^{\circ}\text{C}$  till used. Proteins (20  $\mu\text{g}$ ) were separated by using 12% bis-tris -SDS-PAGE (NuPAGE,  
201 Invitrogen, Carlsbad CA, USA) by electrophoresis. Resolved proteins in the gels were  
202 transferred onto nitrocellulose membranes (Biorad) and electroblotted. Membranes were  
203 blocked with 5% non-fat skimmed milk in Tris-Buffered Saline and Tween 20 (TBST) for 1  
204 hour followed by overnight incubation with the primary antibodies CREB (1:1000), BDNF  
205 (1:1000), PSD-95 (1:1000), Synapsin (1:1000), Synaptophysin (1:1000), SAP 97 (1:1000) at  
206  $4^{\circ}\text{C}$ . The membranes were rinsed with TBST (3 washings for 10 minutes), incubated with the  
207 secondary antibodies (HRP conjugated anti-mouse or anti-rabbit IgG) for 1 h at room  
208 temperature followed by 3 washings for 10 mins with TBST. The bands were visualised by  
209 Odyssey Infrared Imaging System; Li-Cor, Lincoln, NE

#### 210 **Statistical analysis**

211 Data were presented as mean  $\pm$ SEM. Group mean differences were analysed using one-way  
212 ANOVA test followed by Tukey's multiple comparison test as post hoc test. Results were  
213 analysed using GraphPad Prism version 7.04 with probability value of  $p \leq 0.05$  considered as  
214 significant.

215

#### 216 **Results**

##### 217 **Cell viability**

218 Cell viability was tested using CellTiter 96® AQueous One Solution Reagent (Promega) after  
219 24-, 48 and 72-hour treatment with papaverine at concentrations 0.5, 1, 2, 5, 10 and 20  $\mu$ M.  
220 **(Fig.2)**. We did not observe time or concentration dependent neuronal death in cell viability  
221 assay

### 222 **Papaverine reduces QUIN induced reactive oxygen species (ROS) generation in human** 223 **cortical neurons**

224 QUIN exposed neurons showed significant ( $p < 0.01$ ) increase in ROS production compared  
225 to vehicle treated cortical neurons. Pre-treatment with PAP reduced ROS production in QUIN  
226 intoxicated neurons. But a significant ( $p < 0.01$ ) decrease in ROS production was observed at  
227 5  $\mu$ M concentration **(Fig. 3)**. This shows that PAP has the potential to reduce oxidative stress.

### 228 **Papaverine restores mitochondrial membrane potential ( $\Delta\Psi_m$ ) in QUIN exposed** 229 **human neurons**

230 Mitochondrial oxidative stress and  $\Delta\Psi_m$  are involved in the neurodegeneration. Amelioration  
231 of mitochondrial dysfunction is proposed as an effective way for slowing down the  
232 progression of neurodegeneration (Wu et al., 2019). Increased production of ROS affects  
233 mitochondrial structure and function, we assessed  $\Delta\Psi_m$  by using JC10 staining.  
234 Mitochondrial depolarization results in dye release and unquenching, increasing the  
235 fluorescence signal is proportional to  $\Delta\Psi_m$  values. In QUIN exposed human neurons we  
236 found that fluorescence intensity increased significantly ( $p < 0.01$ ) when compared with  
237 vehicle treated neurons, indicating increased mitochondrial depolarisation. Pre-treatment with  
238 PAP decreased mitochondrial depolarization in QUIN intoxicated neurons with a significant  
239 ( $p < 0.05$ ) protection recorded at 5 $\mu$ M **(Fig. 4)**.

240

### 241 **Papaverine suppressed QUIN induced caspase 3/7 activity in human neurons**

242 Neurons primarily use the intrinsic apoptotic pathway to undergo cell death and role of  
243 caspase-3 and caspase 7 in progression of neurodegeneration is well studied using knockout  
244 mouse model (D'Amelio et al., 2010). Increase in the oxidative stress elicits  
245 neurodegeneration by activating the early apoptosis cascade (Dos Santos et al., 2018). We  
246 found that QUIN significantly ( $p < 0.01$ ) increased caspase3/7 activity in neurons when  
247 compared to vehicle treated cells. Pre-treatment with papaverine reduced QUIN induced  
248 caspase 3/7 activity with a significant ( $p < 0.01$ ) decrease at 5  $\mu$ M concentration when  
249 compared with QUIN alone exposed cells **(Fig.5)**.



250 **Papaverine increases intracellular NAD<sup>+</sup>/NADH level in human neurons**

251 We also investigated the effects of PAP on NAD/NADH content in QUIN treated cells.  
252 Human neurons exposed to QUIN showed significant ( $p < 0.01$ ) decrease in intracellular  
253 NAD<sup>+</sup>/NADH content when compared with the vehicle treated cells. Papaverine pre-  
254 treatment showed dose dependent increase in NAD<sup>+</sup>/NADH content and a significant ( $p <$   
255  $0.01$ ) increase was found at 5  $\mu$ M when compared with QUIN exposed human neurons (**Fig.**  
256 **6**).

257 **Papaverine increases intracellular cAMP content in QUIN exposed human neurons**

258 Next, we investigated the effects of PAP on cAMP content in human neurons using ELISA  
259 kit. QUIN exposed neurons were found to have a significant ( $p < 0.05$ ) decrease in cAMP  
260 levels as compared to vehicle treated neurons. Pre-treatment with PAP increased the cAMP  
261 levels when compared with QUIN exposed neurons with a significant ( $p < 0.01$ ) increase at 5  
262  $\mu$ M concentration (**Fig.7**).

263 **Papaverine upregulated CREB/ BDNF expression in primary human neurons**

264 Further we investigated the effects of PAP on the expression of CREB and BDNF in QUIN  
265 exposed human cortical neurons. CREB is an important cellular transcription factor  
266 regulating the expression of neurotrophic factors such as BDNF are important for synaptic  
267 plasticity and memory (Wang et al., 2018). QUIN was shown to significantly ( $p < 0.05$ )  
268 reduce the expression of CREB in human neurons. Pre-treatment with papaverine  
269 significantly increased ( $p < 0.05$ ) the expression of CREB in human neurons (**Fig.8A**). Brain-  
270 derived neurotrophic factor (BDNF) is reported to play an important role in the survival of  
271 neurons (Miranda et al., 2019). A significant decrease ( $p < 0.05$ ) in BDNF expression was  
272 found in QUIN exposed human neurons. Pre-treatment with papaverine significantly ( $p <$   
273  $0.01$ ) reversed the QUIN induced decline in BDNF expression in human neurons as  
274 compared to QUIN exposed cells (**Fig.8B**).

275 **Papaverine increased the expression of synaptic associated proteins like Synapsin-I,**  
276 **Synaptophysin, PSD-95 and SAP-97**

277 Next, we investigated the effects of PAP against QUIN mediated synaptic damage in human  
278 neurons. QUIN exposure significantly reduced the expression of Synapsin I ( $p < 0.05$ ),  
279 synaptophysin ( $p < 0.01$ ), PSD-95 ( $p < 0.01$ ) and SAP-97 ( $p < 0.05$ ) in human neurons. Pre-  
280 treatment with PAP significantly upregulated the expression of Synapsin I ( $p < 0.01$ ),

281 synaptophysin ( $p < 0.01$ ), PSD-95 ( $p < 0.01$ ) and SAP-97 ( $p < 0.01$ ) when compared with  
282 QUIN exposed neurons (**Fig. 9**). Taken together, these results indicate that inhibition of  
283 PDE10A with papaverine was enough to induce both presynaptic and postsynaptic  
284 remodelling and instigate the expression of synapsis associated proteins in QUIN exposed  
285 human neurons.

## 286 **Discussion**

287 The present study is the first of its kind to show the protective effects of papaverine against  
288 QUIN induced excitotoxicity in human neurons. Our results showed that PAP alleviates  
289 oxidative stress by upregulating cAMP and enhances the expression of synaptic proteins.  
290 PDE10A is highly expressed in the hippocampus and cortex which are highly vulnerable to  
291 excitotoxicity (Heckman et al., 2016). PDE10A plays a pivotal role in these neurons as it  
292 regulate cAMP cascade and its inhibition is shown to activate and phosphorylate CREB and  
293 other neurotrophic factors (Steffan et al., 2000). Increased expression of PDE10A precipitates  
294 NMDA receptors and increased dopamine D<sub>1</sub>- and D<sub>2</sub> receptor activity which alters  
295 cognitive and motor functions by disrupting the integration of information from cortical  
296 projections (Smith et al., 2013). Several studies have shown that PDE10A is implicated in the  
297 progression of neurodegenerative diseases such as HD (Cardinale and Fusco, 2018; Harada et  
298 al., 2017), PD (García et al., 2014; Lee et al., 2019a), MS (Suzumura et al., 1999)  
299 schizophrenia (Schmidt et al., 2008) and cognitive dysfunctions (Rodefer et al., 2012) which  
300 is due to overexcitation of NMDA receptors and disruption of mitochondrial bioenergetics  
301 (Bading, 2017).

302 Oxidative stress causes destruction of genetic materials, lipids and proteins (Birben et al.,  
303 2012) and also linked to the pathogenesis of many neurodegenerative diseases (Islam, 2017).  
304 Recently we compiled the data that sleep deprivation alters tryptophan metabolism and the  
305 neurotoxic KP metabolites produced impairs the cognitive functions (Abid, 2020). In this  
306 study we used QUIN to induce oxidative stress in human neurons and observed that PAP, a  
307 cAMP specific PDE10A inhibitor, has promising neuroprotective effects via improving  
308 cAMP signalling and synaptic proteins expression. QUIN increases PARP activity, depletes  
309 NAD<sup>+</sup> (Braidy et al., 2009b), ATP production and activates apoptotic cascade resulting in  
310 neuronal death (Gilles J Guillemin et al., 2005). Inhibition of PDE class of enzymes have  
311 been found to reduce the apoptosis in neuronal cells (Mizuno et al., 2004). In the present  
312 study QUIN exposure induced ROS production, caused mitochondrial membrane

313 depolarization, increased Caspase3/7 activity, and reduced NAD<sup>+</sup>/NADH content in human  
314 primary neurons. Papaverine administration have been found to reduced Caspase-3  
315 expression (Yurtsever Kum et al., 2018) and lipid peroxidation in rats (Chandra et al., 2000).  
316 Papaverine is reported to restore mitochondrial respiration (Benej et al., 2018) by inhibiting  
317 ROS production via supressing the expression of p47phox and improving Nrf2/ARE  
318 signalling cascade in PD mouse model (Lee et al., 2019b). Consistently, in the present study,  
319 we also observed a decrease in the production of ROS, restoration of mitochondrial  
320 membrane potential, decrease in caspase3/7 activity and increased production of NAD<sup>+</sup> in  
321 human neurons treated with papaverine, which reveals the crucial role of PDE10A on  
322 oxidative stress and apoptosis. cAMP signalling cascade contributes in reducing  
323 inflammation and oxidative stress (Jung et al., 2010). Upregulation of PKA/CREB is closely  
324 linked with the ROS neutralising, reducing neuroinflammation and increasing mitochondrial  
325 biogenesis (Fernandez-Marcos and Auwerx, 2011). PAP improved cognitive function in HD  
326 mice by upregulating the expression of cAMP/CREB in hippocampal region (Giralt et al.,  
327 2013). It is reported to increase the expression of neurotrophic factors like BDNF and GDNF  
328 which are necessary for the neuronal survival (Lee et al., 2019b). Increased expression of  
329 BDNF facilitates long term potentiation and enhances memory consolidation in mice  
330 (Radiske et al., 2017). Earlier we showed that PDE4 inhibition upregulates CREB/BDNF  
331 expression in renovascular hypertensive rats (Jabaris et al., 2015). Similarly, PDE10A  
332 inhibition with PAP shown to exert neuroprotective effect by supressing microglial activation  
333 via nuclear factor kappa-light-chain-enhancer of activated B cells (NF-κB) signaling pathway  
334 and proinflammatory mediators and upregulates peroxisome proliferator-activated receptor  
335 gamma (PPAR $\gamma$ ) signaling in mice (Dang et al., 2016; Lee et al., 2019b).

336 The current study adds evidence that PDE10A inhibition also increases cAMP/CREB and  
337 BDNF expression in the QUIN intoxicated human neurons. Further, cAMP is shown to  
338 influences the expression of synaptic proteins which are necessary for synaptic transmission  
339 and release of neurotransmitters (Leenders and Sheng, 2005). Activation of  
340 cAMP/PKA/CREB cascade enhances synaptic transmission in hippocampal neurons  
341 (Leenders and Sheng, 2005). Furthermore, BDNF upregulates the expression of presynaptic  
342 and postsynaptic proteins such as PSD-95, SAP-97, synaptophysin in cortical neurons of  
343 Sprague-Dawley rats (Jourdi and Kabbaj, 2013). We have also recorded a significant increase  
344 in the expression of presynaptic and postsynaptic proteins like SAP-97, synaptophysin,  
345 synapsin-I and PSD-95 with PAP pre-treatment in QUIN exposed human cortical neurons.

346 Thus it can be inferred that PAP produces neuroprotection by upregulating cAMP signalling  
347 cascade which combats the oxidative stress and synaptic dysfunction. Further in vivo studies  
348 are in progress in our lab to study the effects of papaverine on synaptic proteins expression  
349 and cognition in sleep deprived mice, wherein altered kynurenine metabolism and increased  
350 QUIN level produces neurotoxicity.

351

## 352 **Conclusion**

353 The present study reports the neuroprotective effects of papaverine, a PDE10A inhibitor,  
354 against quinolinic acid induced excitotoxicity in human neurons. Our study suggests that  
355 upregulation of cAMP cascade by papaverine plays a key role in reducing oxidative stress  
356 and increasing the expression of synaptic proteins. Therefore, papaverine may be considered  
357 a promising therapeutic candidate for further studies aiming to improve synaptic function in  
358 neurodegenerative diseases.

## 359 **Acknowledgment**

360 Mr. Abid Bhat is supported by the IBRO-APRC Exchange Fellowships program, Macquarie  
361 University and Senior Research Fellowship from the Indian Council of Medical Research  
362 (ICMR, New Delhi, India). Prof Guillemin is supported by the National Health Medical  
363 Research Council (NHMRC), the Australian Research Council (ARC), the Hanbury  
364 Foundation, the Mason Foundation and Macquarie University.

365

## 366 **Conflicts of interest**

367 Authors declare no conflicts of interest.

## 368 **Informed Consent**

369 Written informed consent was obtained from the parents (5201300330).

## 370 **Abbreviations**

371 AD: Alzheimer's diseases; ALS: Amyotrophic lateral sclerosis; ANOVA: Analysis of  
372 variance; A $\beta$ : Amyloid beta; ARE: Antioxidant response element; ATP: Adenosine  
373 triphosphate; BDNF: Brain-derived neurotrophic factor; cAMP: Cyclic adenosine  
374 monophosphate; cGMP: Cyclic guanosine monophosphate; CREB: cAMP response element-  
375 binding protein; Cyt c: Cytochrome c; DCFDA: 2',7'-Dichlorofluorescein Diacetate; EDTA:  
376 Ethylenediaminetetraacetic acid; HEPES: 4-(2-hydroxyethyl)-1-piperazineethanesulfonic  
377 acid; HD: Huntington's disease; JC-10:5,5,6,6'-tetrachloro-1,1',3,3' tetraethylbenzimi-  
378 dazolylcarbocyanine iodide; KP: Kynurenine pathway; MS: Multiple sclerosis; MTS: 3-(4,5-

379 dimethylthiazol-2-yl)-2,5-diphenyltetrazolium bromide; NAD: Nicotinamide adenine  
380 dinucleotide; NMDA: N-methyl-D-aspartate; NF-Kb: Nuclear factor kappa-light-chain-  
381 enhancer of activated B cells; nNOS: Neuronal nitric oxide synthase; Nrf2: Nuclear erythroid  
382 2-related factor 2; PAP: Papaverine; PARP: Poly (ADP-ribose) polymerase; PBS:  
383 Phosphate-buffered saline; PD: Parkinson's disease; PDE: Phosphodiesterase; PDE10A:  
384 Phosphodiesterase-10A; PKA: Protein kinase A; pNpp: para-Nitrophenyl phosphate; PPAR $\gamma$ :  
385 Peroxisome proliferator-activated receptor gamma; PSD-95: Post synaptic density protein-95;  
386 QUIN: Quinolinic acid; RIPA: Radioimmunoprecipitation assay; ROF: Roflumilast; ROS:  
387 Reactive oxygen species; SAP 97: Synapse-associated protein 97; SDS: Sodium dodecyl  
388 sulphate; SYN1: Synapsin- I; TBST; Tris-Buffered Saline and Tween 20;  $\Delta\Psi_m$ :  
389 mitochondrial membrane potential

390

391

392 **References**

- 393 Abraham, W.C., Jones, O.D., Glanzman, D.L., 2019. Is plasticity of synapses the mechanism  
394 of long-term memory storage? *Npj Sci. Learn.* 4, 1–10.  
395 <https://doi.org/10.1038/s41539-019-0048-y>
- 396 Ansari, M.A., Roberts, K.N., Scheff, S.W., 2008a. A time course of contusion-induced  
397 oxidative stress and synaptic proteins in cortex in a rat model of TBI. *J. Neurotrauma*  
398 25, 513–526. <https://doi.org/10.1089/neu.2007.0451>
- 399 Ansari, M.A., Roberts, K.N., Scheff, S.W., 2008b. Oxidative stress and modification of  
400 synaptic proteins in hippocampus after traumatic brain injury. *Free Radic. Biol. Med.*  
401 45, 443–452. <https://doi.org/10.1016/j.freeradbiomed.2008.04.038>
- 402 Bading, H., 2017. Therapeutic targeting of the pathological triad of extrasynaptic NMDA  
403 receptor signaling in neurodegenerations. *J. Exp. Med.* 214, 569–578.  
404 <https://doi.org/10.1084/jem.20161673>
- 405 Benej, M., Hong, X., Vibhute, S., Scott, S., Wu, J., Graves, E., Le, Q.-T., Koong, A.C.,  
406 Giaccia, A.J., Yu, B., Chen, C.-S., Papandreou, I., Denko, N.C., 2018. Papaverine and  
407 its derivatives radiosensitize solid tumors by inhibiting mitochondrial metabolism.  
408 *Proc. Natl. Acad. Sci. U. S. A.* 115, 10756–10761.  
409 <https://doi.org/10.1073/pnas.1808945115>
- 410 Bhat, A., Ray, B., Mahalakshmi, A.M., Tuladhar, S., Nandakumar, D., Srinivasan, M., Essa,  
411 M.M., Chidambaram, S.B., Guillemin, G.J., Sakharkar, M.K., 2020.  
412 Phosphodiesterase-4 enzyme as a therapeutic target in neurological disorders.  
413 *Pharmacol. Res.* 105078. <https://doi.org/10.1016/j.phrs.2020.105078>
- 414 Birben, E., Sahiner, U.M., Sackesen, C., Erzurum, S., Kalayci, O., 2012. Oxidative Stress and  
415 Antioxidant Defense. *World Allergy Organ. J.* 5, 9–19.  
416 <https://doi.org/10.1097/WOX.0b013e3182439613>
- 417 Boswell-Smith, V., Spina, D., Page, C.P., 2006. Phosphodiesterase inhibitors. *Br. J.*  
418 *Pharmacol.* 147, S252–S257. <https://doi.org/10.1038/sj.bjp.0706495>
- 419 Braidy, N., Grant, R., Adams, S., Brew, B.J., Guillemin, G.J., 2009a. Mechanism for  
420 quinolinic acid cytotoxicity in human astrocytes and neurons. *Neurotox. Res.* 16, 77–  
421 86. <https://doi.org/10.1007/s12640-009-9051-z>
- 422 Braidy, N., Grant, R., Adams, S., Brew, B.J., Guillemin, G.J., 2009b. Mechanism for  
423 quinolinic acid cytotoxicity in human astrocytes and neurons. *Neurotox. Res.* 16, 77–  
424 86. <https://doi.org/10.1007/s12640-009-9051-z>

- 425 Braidy, N., Grant, R., Adams, S., Guillemin, G.J., 2010. Neuroprotective effects of naturally  
426 occurring polyphenols on quinolinic acid-induced excitotoxicity in human neurons.  
427 FEBS J. 277, 368–382. <https://doi.org/10.1111/j.1742-4658.2009.07487.x>
- 428 Cao, X., Zhao, S., Liu, D., Wang, Z., Niu, L., Hou, L., Wang, C., 2011. ROS-Ca<sup>2+</sup> is  
429 associated with mitochondria permeability transition pore involved in surfactin-  
430 induced MCF-7 cells apoptosis. Chem. Biol. Interact. 190, 16–27.  
431 <https://doi.org/10.1016/j.cbi.2011.01.010>
- 432 Cardinale, A., Fusco, F.R., 2018. Inhibition of phosphodiesterases as a strategy to achieve  
433 neuroprotection in Huntington’s disease. CNS Neurosci. Ther. 24, 319–328.  
434 <https://doi.org/10.1111/cns.12834>
- 435 Chandra, R., Aneja, R., Rewal, C., Konduri, R., Dass, S.K., Agarwal, S., 2000. An opium  
436 alkaloid-papaverine ameliorates ethanol-induced hepatotoxicity: Diminution of  
437 oxidative stress. Indian J. Clin. Biochem. 15, 155–160.  
438 <https://doi.org/10.1007/BF02883745>
- 439 Chen, Y., Stankovic, R., Cullen, K.M., Meiningner, V., Garner, B., Coggan, S., Grant, R.,  
440 Brew, B.J., Guillemin, G.J., 2010. The kynurenine pathway and inflammation in  
441 amyotrophic lateral sclerosis. Neurotox. Res. 18, 132–142.  
442 <https://doi.org/10.1007/s12640-009-9129-7>
- 443 Counts, S.E., Nadeem, M., Lad, S.P., Wu, J., Mufson, E.J., 2006. Differential expression of  
444 synaptic proteins in the frontal and temporal cortex of elderly subjects with mild  
445 cognitive impairment. J. Neuropathol. Exp. Neurol. 65, 592–601.  
446 <https://doi.org/10.1097/00005072-200606000-00007>
- 447 D’Amelio, M., Cavallucci, V., Cecconi, F., 2010. Neuronal caspase-3 signaling: not only cell  
448 death. Cell Death Differ. 17, 1104–1114. <https://doi.org/10.1038/cdd.2009.180>
- 449 Dang, Y., Mu, Y., Wang, K., Xu, K., Yang, J., Zhu, Y., Luo, B., 2016. Papaverine inhibits  
450 lipopolysaccharide-induced microglial activation by suppressing NF-κB signaling  
451 pathway. Drug Des. Devel. Ther. 10, 851–859. <https://doi.org/10.2147/DDDT.S97380>
- 452 Dos Santos, A.A., López-Granero, C., Farina, M., Rocha, J.B.T., Bowman, A.B., Aschner,  
453 M., 2018. Oxidative stress, caspase-3 activation and cleavage of ROCK-1 play an  
454 essential role in MeHg-induced cell death in primary astroglial cells. Food Chem.  
455 Toxicol. Int. J. Publ. Br. Ind. Biol. Res. Assoc. 113, 328–336.  
456 <https://doi.org/10.1016/j.fct.2018.01.057>

- 457 Fernandez-Marcos, P.J., Auwerx, J., 2011. Regulation of PGC-1 $\alpha$ , a nodal regulator of  
458 mitochondrial biogenesis. *Am. J. Clin. Nutr.* 93, 884S-890S.  
459 <https://doi.org/10.3945/ajcn.110.001917>
- 460 García, A.M., Redondo, M., Martínez, A., Gil, C., 2014. Phosphodiesterase 10 inhibitors:  
461 new disease modifying drugs for Parkinson's disease? *Curr. Med. Chem.* 21, 1171–  
462 1187. <https://doi.org/10.2174/0929867321666131228221749>
- 463 Giampà, C., Laurenti, D., Anzilotti, S., Bernardi, G., Menniti, F.S., Fusco, F.R., 2010.  
464 Inhibition of the Striatal Specific Phosphodiesterase PDE10A Ameliorates Striatal  
465 and Cortical Pathology in R6/2 Mouse Model of Huntington's Disease. *PLOS ONE* 5,  
466 e13417. <https://doi.org/10.1371/journal.pone.0013417>
- 467 Giralt, A., Saavedra, A., Carretón, O., Arumí, H., Tyebji, S., Alberch, J., Pérez-Navarro, E.,  
468 2013. PDE10 inhibition increases GluA1 and CREB phosphorylation and improves  
469 spatial and recognition memories in a Huntington's disease mouse model.  
470 *Hippocampus* 23, 684–695. <https://doi.org/10.1002/hipo.22128>
- 471 Guillemin, G.J., 2012. Quinolinic acid, the inescapable neurotoxin. *FEBS J.* 279, 1356–1365.  
472 <https://doi.org/10.1111/j.1742-4658.2012.08485.x>
- 473 Guillemin, G. J., Brew, B.J., Noonan, C.E., Takikawa, O., Cullen, K.M., 2005. Indoleamine  
474 2,3 dioxygenase and quinolinic acid immunoreactivity in Alzheimer's disease  
475 hippocampus. *Neuropathol. Appl. Neurobiol.* 31, 395–404.  
476 <https://doi.org/10.1111/j.1365-2990.2005.00655.x>
- 477 Guillemin, G.J., Cullen, K.M., Lim, C.K., Smythe, G.A., Garner, B., Kapoor, V., Takikawa,  
478 O., Brew, B.J., 2007. Characterization of the kynurenine pathway in human neurons. *J.*  
479 *Neurosci. Off. J. Soc. Neurosci.* 27, 12884–12892.  
480 <https://doi.org/10.1523/JNEUROSCI.4101-07.2007>
- 481 Guillemin, Gilles J, Wang, L., Brew, B.J., 2005. Quinolinic acid selectively induces apoptosis  
482 of human astrocytes: potential role in AIDS dementia complex. *J. Neuroinflammation*  
483 2, 16. <https://doi.org/10.1186/1742-2094-2-16>
- 484 Han, X., Lamshöft, M., Grobe, N., Ren, X., Fist, A.J., Kutchan, T.M., Spitteller, M., Zenk,  
485 M.H., 2010. The biosynthesis of papaverine proceeds via (S)-reticuline.  
486 *Phytochemistry* 71, 1305–1312. <https://doi.org/10.1016/j.phytochem.2010.04.022>
- 487 Hankir, M.K., Kranz, M., Gnad, T., Weiner, J., Wagner, S., Deuther-Conrad, W., Bronisch,  
488 F., Steinhoff, K., Luthardt, J., Klötting, N., Hesse, S., Seibyl, J.P., Sabri, O., Heiker,  
489 J.T., Blüher, M., Pfeifer, A., Brust, P., Fenske, W.K., 2016. A novel thermoregulatory



- 490 role for PDE10A in mouse and human adipocytes. *EMBO Mol. Med.* 8, 796–812.  
491 <https://doi.org/10.15252/emmm.201506085>
- 492 Harada, A., Suzuki, K., Kimura, H., 2017. TAK-063, a Novel Phosphodiesterase 10A  
493 Inhibitor, Protects from Striatal Neurodegeneration and Ameliorates Behavioral  
494 Deficits in the R6/2 Mouse Model of Huntington’s Disease. *J. Pharmacol. Exp. Ther.*  
495 360, 75–83. <https://doi.org/10.1124/jpet.116.237388>
- 496 Heckman, P.R.A., van Duinen, M.A., Bollen, E.P.P., Nishi, A., Wennogle, L.P., Blokland, A.,  
497 Prickaerts, J., 2016. Phosphodiesterase Inhibition and Regulation of Dopaminergic  
498 Frontal and Striatal Functioning: Clinical Implications. *Int. J. Neuropsychopharmacol.*  
499 19. <https://doi.org/10.1093/ijnp/pyw030>
- 500 Huttenlocher, P.R., Dabholkar, A.S., 1997. Regional differences in synaptogenesis in human  
501 cerebral cortex. *J. Comp. Neurol.* 387, 167–178. [https://doi.org/10.1002/\(sici\)1096-9861\(19971020\)387:2<167::aid-cne1>3.0.co;2-z](https://doi.org/10.1002/(sici)1096-9861(19971020)387:2<167::aid-cne1>3.0.co;2-z)
- 503 Islam, M.T., 2017. Oxidative stress and mitochondrial dysfunction-linked neurodegenerative  
504 disorders. *Neurol. Res.* 39, 73–82. <https://doi.org/10.1080/01616412.2016.1251711>
- 505 Jabaris, S.G.S.L., Sumathy, H., Kumar, R.S., Narayanan, S., Thanikachalam, S., Babu, C.S.,  
506 2015. Effects of rolipram and roflumilast, phosphodiesterase-4 inhibitors, on  
507 hypertension-induced defects in memory function in rats. *Eur. J. Pharmacol.* 746,  
508 138–147. <https://doi.org/10.1016/j.ejphar.2014.10.039>
- 509 Jourdi, H., Kabbaj, M., 2013. Acute BDNF Treatment Upregulates GluR1-SAP97 and  
510 GluR2-GRIP1 Interactions: Implications for Sustained AMPA Receptor Expression.  
511 *PLOS ONE* 8, e57124. <https://doi.org/10.1371/journal.pone.0057124>
- 512 Jung, J.-S., Shin, J.A., Park, E.-M., Lee, J.-E., Kang, Y.-S., Min, S.-W., Kim, D.-H., Hyun,  
513 J.-W., Shin, C.-Y., Kim, H.-S., 2010. Anti-inflammatory mechanism of ginsenoside  
514 Rh1 in lipopolysaccharide-stimulated microglia: critical role of the protein kinase A  
515 pathway and hemeoxygenase-1 expression. *J. Neurochem.* 115, 1668–1680.  
516 <https://doi.org/10.1111/j.1471-4159.2010.07075.x>
- 517 Kim, J.H., Yi, H.-J., Ko, Y., Kim, Y.-S., Kim, D.-W., Kim, J.-M., 2014. Effectiveness of  
518 papaverine cisternal irrigation for cerebral vasospasm after aneurysmal subarachnoid  
519 hemorrhage and measurement of biomarkers. *Neurol. Sci. Off. J. Ital. Neurol. Soc.*  
520 *Ital. Soc. Clin. Neurophysiol.* 35, 715–722. [https://doi.org/10.1007/s10072-013-1589-](https://doi.org/10.1007/s10072-013-1589-0)  
521 0
- 522 Kim, S.M., Chung, M.J., Ha, T.J., Choi, H.N., Jang, S.J., Kim, S.O., Chun, M.H., Do, S.I.,  
523 Choo, Y.K., Park, Y.I., 2012. Neuroprotective effects of black soybean anthocyanins

- 524 via inactivation of ASK1-JNK/p38 pathways and mobilization of cellular sialic acids.  
525 Life Sci. 90, 874–882. <https://doi.org/10.1016/j.lfs.2012.04.025>
- 526 Kowiański, P., Lietzau, G., Czuba, E., Waśkow, M., Steliga, A., Moryś, J., 2018. BDNF: A  
527 Key Factor with Multipotent Impact on Brain Signaling and Synaptic Plasticity. Cell.  
528 Mol. Neurobiol. 38, 579–593. <https://doi.org/10.1007/s10571-017-0510-4>
- 529 Lee, Y.-Y., Park, J.-S., Leem, Y.-H., Park, J.-E., Kim, D.-Y., Choi, Y.-H., Park, E.-M., Kang,  
530 J.L., Kim, H.-S., 2019a. The phosphodiesterase 10 inhibitor papaverine exerts anti-  
531 inflammatory and neuroprotective effects via the PKA signaling pathway in  
532 neuroinflammation and Parkinson’s disease mouse models. J. Neuroinflammation 16,  
533 246. <https://doi.org/10.1186/s12974-019-1649-3>
- 534 Lee, Y.-Y., Park, J.-S., Leem, Y.-H., Park, J.-E., Kim, D.-Y., Choi, Y.-H., Park, E.-M., Kang,  
535 J.L., Kim, H.-S., 2019b. The phosphodiesterase 10 inhibitor papaverine exerts anti-  
536 inflammatory and neuroprotective effects via the PKA signaling pathway in  
537 neuroinflammation and Parkinson’s disease mouse models. J. Neuroinflammation 16,  
538 246. <https://doi.org/10.1186/s12974-019-1649-3>
- 539 Leenders, A.G.M., Sheng, Z.-H., 2005. Modulation of neurotransmitter release by the second  
540 messenger-activated protein kinases: Implications for presynaptic plasticity.  
541 Pharmacol. Ther. 105, 69–84. <https://doi.org/10.1016/j.pharmthera.2004.10.012>
- 542 Lim, C.K., Bilgin, A., Lovejoy, D.B., Tan, V., Bustamante, S., Taylor, B.V., Bessede, A.,  
543 Brew, B.J., Guillemin, G.J., 2017. Kynurenine pathway metabolomics predicts and  
544 provides mechanistic insight into multiple sclerosis progression. Sci. Rep. 7, 1–9.  
545 <https://doi.org/10.1038/srep41473>
- 546 Miranda, M., Morici, J.F., Zanoni, M.B., Bekinschtein, P., 2019. Brain-Derived Neurotrophic  
547 Factor: A Key Molecule for Memory in the Healthy and the Pathological Brain. Front.  
548 Cell. Neurosci. 13. <https://doi.org/10.3389/fncel.2019.00363>
- 549 Mishra, J., Kumar, A., 2014. Improvement of mitochondrial function by paliperidone  
550 attenuates quinolinic acid-induced behavioural and neurochemical alterations in rats:  
551 implications in Huntington’s disease. Neurotox. Res. 26, 363–381.  
552 <https://doi.org/10.1007/s12640-014-9469-9>
- 553 Mizuno, T., Kurotani, T., Komatsu, Y., Kawanokuchi, J., Kato, H., Mitsuma, N., Suzumura,  
554 A., 2004. Neuroprotective role of phosphodiesterase inhibitor ibudilast on neuronal  
555 cell death induced by activated microglia. Neuropharmacology 46, 404–411.  
556 <https://doi.org/10.1016/j.neuropharm.2003.09.009>

- 557 Nazir, F.H., Becker, B., Brinkmalm, A., Höglund, K., Sandelius, Å., Bergström, P., Satir,  
558 T.M., Öhrfelt, A., Blennow, K., Agholme, L., Zetterberg, H., 2018. Expression and  
559 secretion of synaptic proteins during stem cell differentiation to cortical neurons.  
560 *Neurochem. Int.* 121, 38–49. <https://doi.org/10.1016/j.neuint.2018.10.014>
- 561 Niccolini, F., Haider, S., Reis Marques, T., Muhlert, N., Tziortzi, A.C., Searle, G.E., Natesan,  
562 S., Piccini, P., Kapur, S., Rabiner, E.A., Gunn, R.N., Tabrizi, S.J., Politis, M., 2015.  
563 Altered PDE10A expression detectable early before symptomatic onset in  
564 Huntington’s disease. *Brain* 138, 3016–3029. <https://doi.org/10.1093/brain/awv214>
- 565 Persson, J., Szalisznyó, K., Antoni, G., Wall, A., Fällmar, D., Zora, H., Bodén, R., 2020.  
566 Phosphodiesterase 10A levels are related to striatal function in schizophrenia: a  
567 combined positron emission tomography and functional magnetic resonance imaging  
568 study. *Eur. Arch. Psychiatry Clin. Neurosci.* 270, 451–459.  
569 <https://doi.org/10.1007/s00406-019-01021-0>
- 570 Radiske, A., Rossato, J.I., Gonzalez, M.C., Köhler, C.A., Bevilacqua, L.R., Cammarota, M.,  
571 2017. BDNF controls object recognition memory reconsolidation. *Neurobiol. Learn.*  
572 *Mem., Memory reconsolidation and memory updating* 142, 79–84.  
573 <https://doi.org/10.1016/j.nlm.2017.02.018>
- 574 Rahman, A., Rao, M.S., Khan, K.M., 2018. Intraventricular infusion of quinolinic acid  
575 impairs spatial learning and memory in young rats: a novel mechanism of lead-  
576 induced neurotoxicity. *J. Neuroinflammation* 15, 263. <https://doi.org/10.1186/s12974-018-1306-2>
- 578 Ren, J.-G., Seth, P., Everett, P., Clish, C.B., Sukhatme, V.P., 2010. Induction of Erythroid  
579 Differentiation in Human Erythroleukemia Cells by Depletion of Malic Enzyme 2.  
580 *PLOS ONE* 5, e12520. <https://doi.org/10.1371/journal.pone.0012520>
- 581 Rodefer, J.S., Saland, S.K., Eckrich, S.J., 2012. Selective phosphodiesterase inhibitors  
582 improve performance on the ED/ID cognitive task in rats. *Neuropharmacology* 62,  
583 1182–1190. <https://doi.org/10.1016/j.neuropharm.2011.08.008>
- 584 Roush, E., Harlen, K., Hendrickson, M., Hughes, T.E., 2020. Neurodegenerative Disease and  
585 cAMP Signaling Dynamics. *Biophys. J.* 118, 456a.  
586 <https://doi.org/10.1016/j.bpj.2019.11.2540>
- 587 Schmidt, C.J., Chapin, D.S., Cianfrogna, J., Corman, M.L., Hajos, M., Harms, J.F., Hoffman,  
588 W.E., Lebel, L.A., McCarthy, S.A., Nelson, F.R., Proulx-LaFrance, C., Majchrzak,  
589 M.J., Ramirez, A.D., Schmidt, K., Seymour, P.A., Siuciak, J.A., Tingley, F.D.,  
590 Williams, R.D., Verhoest, P.R., Menniti, F.S., 2008. Preclinical Characterization of

- 591 Selective Phosphodiesterase 10A Inhibitors: A New Therapeutic Approach to the  
592 Treatment of Schizophrenia. *J. Pharmacol. Exp. Ther.* 325, 681–690.  
593 <https://doi.org/10.1124/jpet.107.132910>
- 594 Siuciak, J.A., McCarthy, S.A., Chapin, D.S., Fujiwara, R.A., James, L.C., Williams, R.D.,  
595 Stock, J.L., McNeish, J.D., Strick, C.A., Menniti, F.S., Schmidt, C.J., 2006. Genetic  
596 deletion of the striatum-enriched phosphodiesterase PDE10A: evidence for altered  
597 striatal function. *Neuropharmacology* 51, 374–385.  
598 <https://doi.org/10.1016/j.neuropharm.2006.01.012>
- 599 Smith, S.M., Uslander, J.M., Cox, C.D., Huszar, S.L., Cannon, C.E., Vardigan, J.D., Eddins,  
600 D., Toolan, D.M., Kandebo, M., Yao, L., Raheem, I.T., Schreier, J.D., Breslin, M.J.,  
601 Coleman, P.J., Renger, J.J., 2013. The novel phosphodiesterase 10A inhibitor THPP-1  
602 has antipsychotic-like effects in rat and improves cognition in rat and rhesus monkey.  
603 *Neuropharmacology* 64, 215–223. <https://doi.org/10.1016/j.neuropharm.2012.06.013>
- 604 Steffan, J.S., Kazantsev, A., Spasic-Boskovic, O., Greenwald, M., Zhu, Y.-Z., Gohler, H.,  
605 Wanker, E.E., Bates, G.P., Housman, D.E., Thompson, L.M., 2000. The Huntington's  
606 disease protein interacts with p53 and CREB-binding protein and represses  
607 transcription. *Proc. Natl. Acad. Sci.* 97, 6763–6768.  
608 <https://doi.org/10.1073/pnas.100110097>
- 609 Sumathi, T., Vedagiri, A., Ramachandran, S., Purushothaman, B., 2018. Quinolinic Acid-  
610 Induced Huntington Disease-Like Symptoms Mitigated by Potent Free Radical  
611 Scavenger Edaravone—a Pilot Study on Neurobehavioral, Biochemical, and  
612 Histological Approach in Male Wistar Rats. *J. Mol. Neurosci.* 66, 322–341.  
613 <https://doi.org/10.1007/s12031-018-1168-1>
- 614 Sundaram, G., Brew, B.J., Jones, S.P., Adams, S., Lim, C.K., Guillemin, G.J., 2014.  
615 Quinolinic acid toxicity on oligodendroglial cells: relevance for multiple sclerosis and  
616 therapeutic strategies. *J. Neuroinflammation* 11, 204. <https://doi.org/10.1186/s12974-014-0204-5>
- 618 Suzumura, A., Ito, A., Yoshikawa, M., Sawada, M., 1999. Ibudilast suppresses TNFalpha  
619 production by glial cells functioning mainly as type III phosphodiesterase inhibitor in  
620 the CNS. *Brain Res.* 837, 203–212. [https://doi.org/10.1016/s0006-8993\(99\)01666-2](https://doi.org/10.1016/s0006-8993(99)01666-2)
- 621 Valtschanoff, J.G., Burette, A., Davare, M.A., Leonard, A.S., Hell, J.W., Weinberg, R.J.,  
622 2000. SAP97 concentrates at the postsynaptic density in cerebral cortex. *Eur. J.*  
623 *Neurosci.* 12, 3605–3614. <https://doi.org/10.1046/j.1460-9568.2000.00256.x>

- 624 Wang, H., Xu, J., Lazarovici, P., Quirion, R., Zheng, W., 2018. cAMP Response Element-  
625 Binding Protein (CREB): A Possible Signaling Molecule Link in the Pathophysiology  
626 of Schizophrenia. *Front. Mol. Neurosci.* 11. <https://doi.org/10.3389/fnmol.2018.00255>
- 627 Wilson, R.F., White, C.W., 1986. Intracoronary papaverine: an ideal coronary vasodilator for  
628 studies of the coronary circulation in conscious humans. *Circulation* 73, 444–451.  
629 <https://doi.org/10.1161/01.cir.73.3.444>
- 630 Wu, Y., Chen, M., Jiang, J., 2019. Mitochondrial dysfunction in neurodegenerative diseases  
631 and drug targets via apoptotic signaling. *Mitochondrion* 49, 35–45.  
632 <https://doi.org/10.1016/j.mito.2019.07.003>
- 633 Yurtsever Kum, N., Yilmaz, Y.F., Gurgun, S.G., Kum, R.O., Ozcan, M., Unal, A., 2018.  
634 Effects of Parenteral Papaverine and Piracetam Administration on Cochlea Following  
635 Acoustic Trauma. *Noise Health* 20, 47–52. [https://doi.org/10.4103/nah.NAH\\_31\\_17](https://doi.org/10.4103/nah.NAH_31_17)
- 636 Zinger, A., Barcia, C., Herrero, M.T., Guillemin, G.J., 2011. The Involvement of  
637 Neuroinflammation and Kynurenine Pathway in Parkinson's Disease [WWW  
638 Document]. *Park. Dis.* <https://doi.org/10.4061/2011/716859>  
639

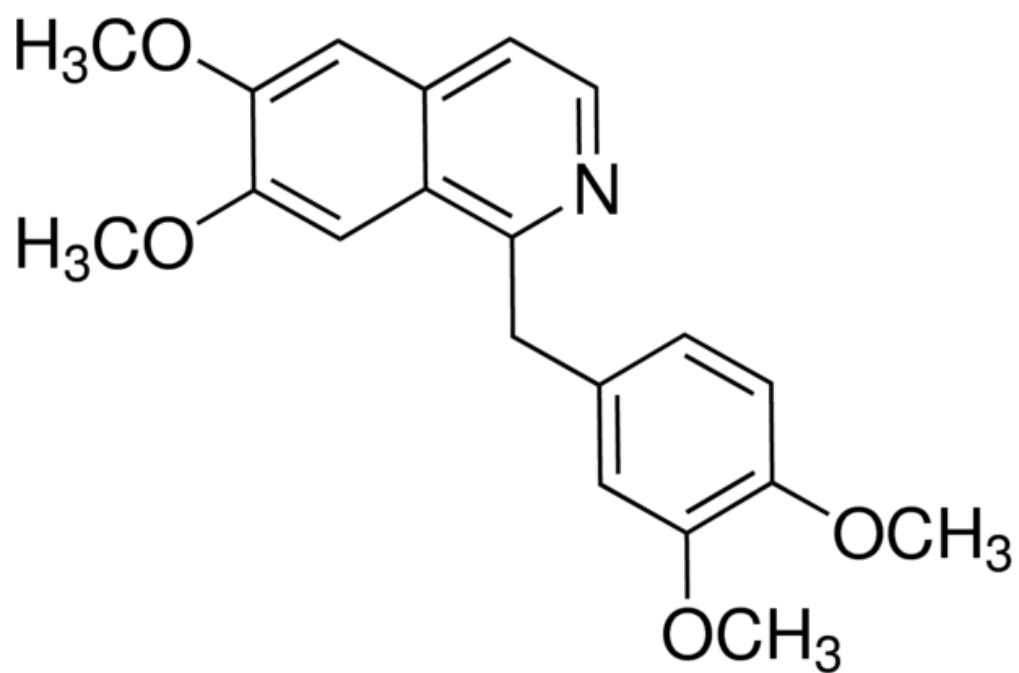

**Figure 1:** Chemical structure of Papaverine drawn with ChemBioDraw Ultra 12.

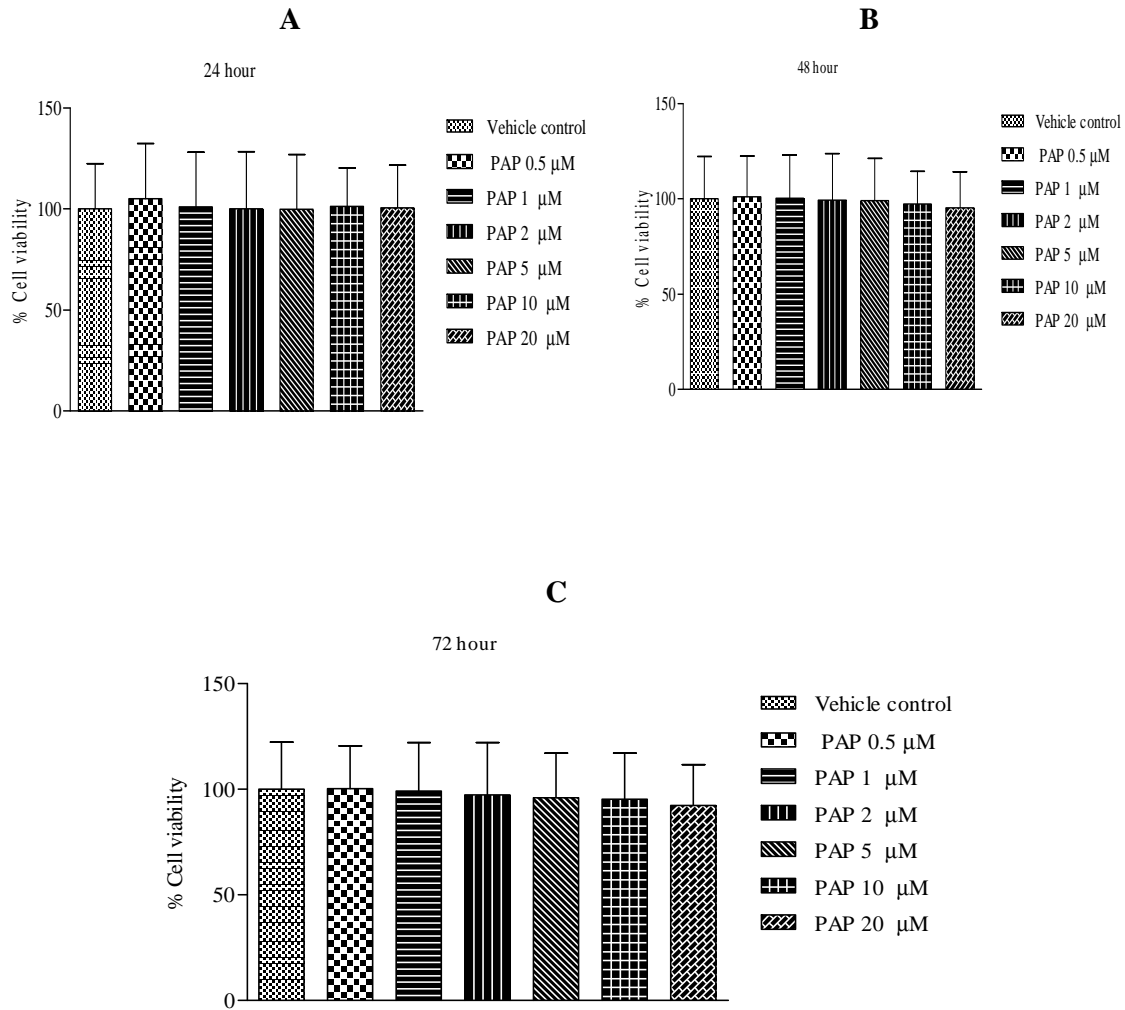

**Figure 2: Papaverine did not show toxic effects at the tested concentration in human cortical neurons.** (A) Human cortical neurons were treated with various concentrations of PAP and assessed for cell viability at 24 (A), 48 (B) and 72 h (C) using MTS solution.

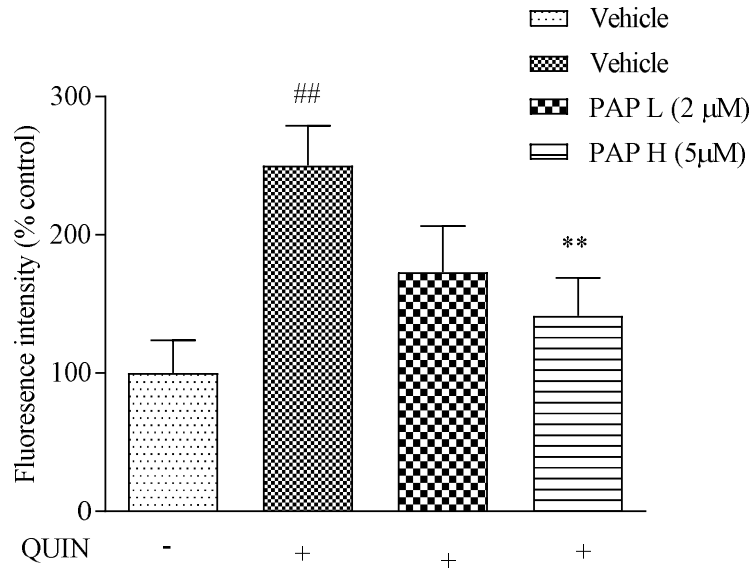

**Figure 3: Papaverine reduces QUIN-induced ROS production in human neurons.** Neurons were pre-treated with PAP (2 μM & 5 μM) for 24 hours, followed by 48-hour exposure with QUIN (2 μM). Data are presented as mean ± SEM (n = 3) and represent three independent experiments. ## denotes  $p < 0.01$  vs vehicle, \*\* denotes  $p < 0.01$  vs QUIN exposed neurons



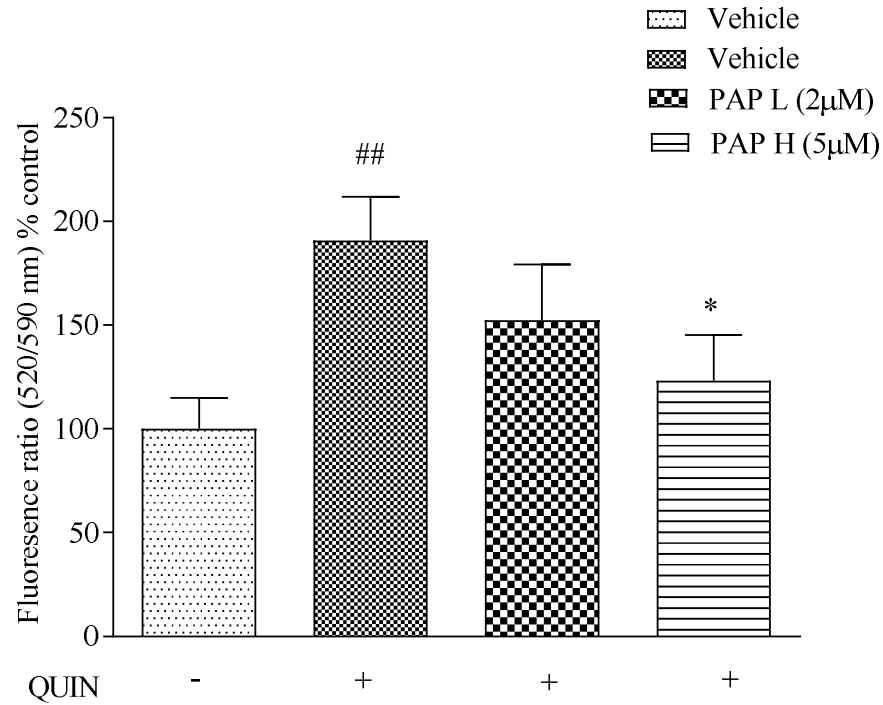

**Figure 4: Papaverine restores mitochondrial membrane potential in QUIN exposed human cortical neurons.** Neurons were pretreated with PAP (2μM & 5 μM) for 24 hours, followed by 48-hour exposure with QUIN (2μM). Neurons were incubated with JC-10 (30 μM) for 20 min. Data are presented as mean ± SEM (n = 3) and represent three independent experiments. ## denotes  $p < 0.01$  vs vehicle, \* denotes  $p < 0.05$  vs QUIN exposed neurons

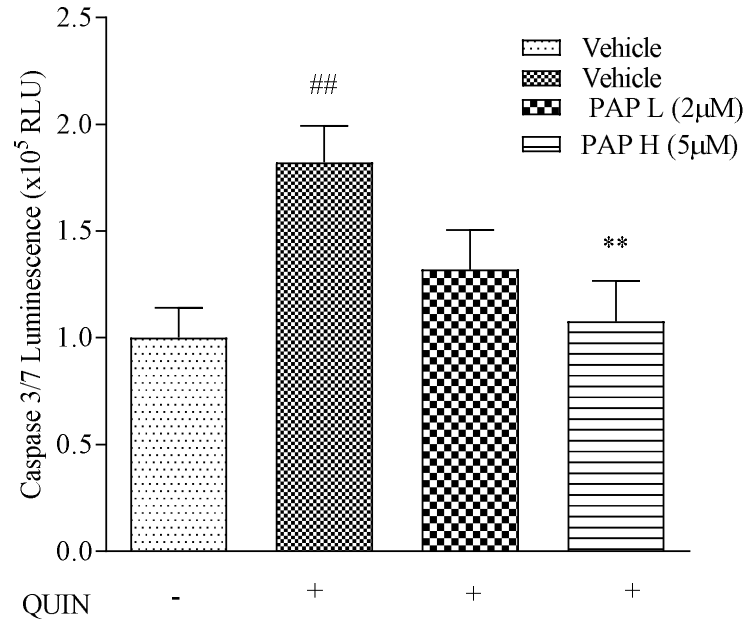

**Figure 5: Papaverine decreases Caspase 3/7 activity in QUIN exposed human neurons.** Neurons were pre-treated with PAP (2μM & 5 μM) for 24 hours, followed by 48-hour exposure with QUIN (2μM). Caspase 3/7 activity was assessed using ApoTox-Glo Triplex Assay kit (Promega, Madison, WI, USA). Data are presented as mean ± SEM (n = 3) and represent three independent experiments. ## denotes  $p < 0.01$  vs vehicle, \*\*denotes  $p < 0.01$  vs QUIN exposed neurons

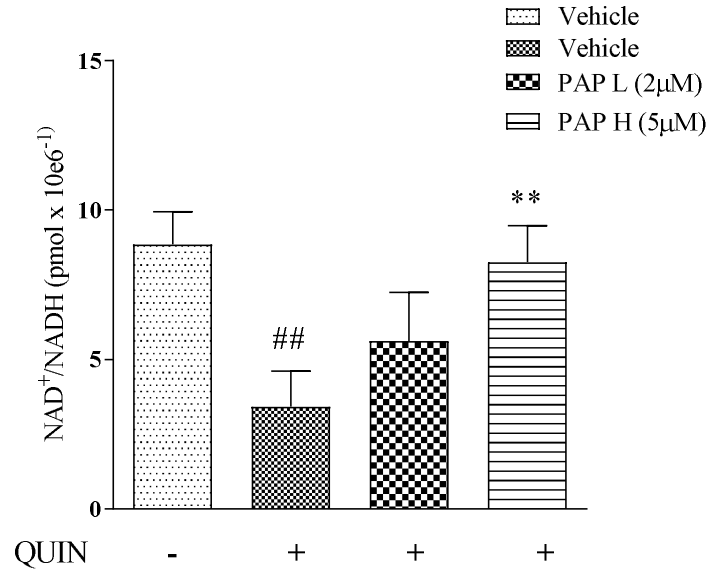

**Figure 6: Papaverine increases NAD<sup>+</sup>/NADH levels in QUIN exposed human neurons.** Neurons were pre-treated with PAP (2 μM & 5 μM) for 24 hours, followed by 48-hour exposure with QUIN (2μM). NAD<sup>+</sup>/NADH concentration were measured in accordance with the manufacturer's instruction (Abcam, Inc., Cambridge, MA, USA). Data are presented as mean ± SEM (n = 3) and represent three independent experiments. ## denotes  $p < 0.01$  vs vehicle, \*\* denotes  $p < 0.01$  vs QUIN exposed neurons

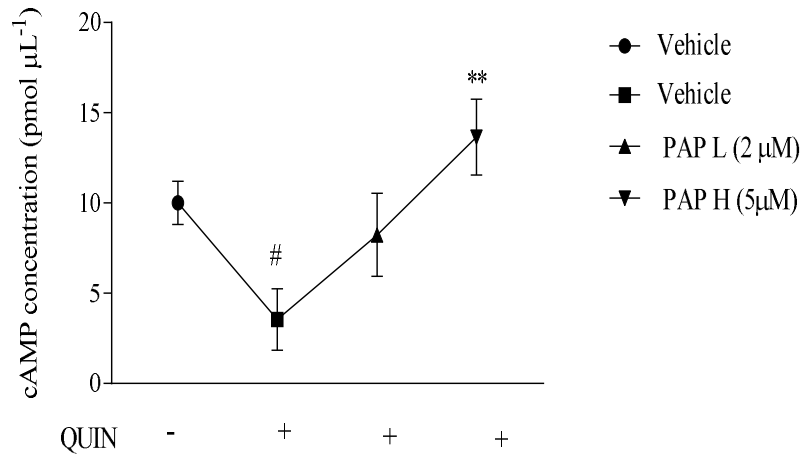

**Figure 6: Effect of PAP on cAMP concentration in QUIN exposed human neurons**

Pre-treatment with PAP increased cAMP concentration in QUIN exposed human neurons. Data are presented as mean  $\pm$  SEM ( $n = 3$ ) and represent three independent experiments. # denotes  $p < 0.05$  vs vehicle, \*\*denotes  $p < 0.01$  vs QUIN exposed neurons

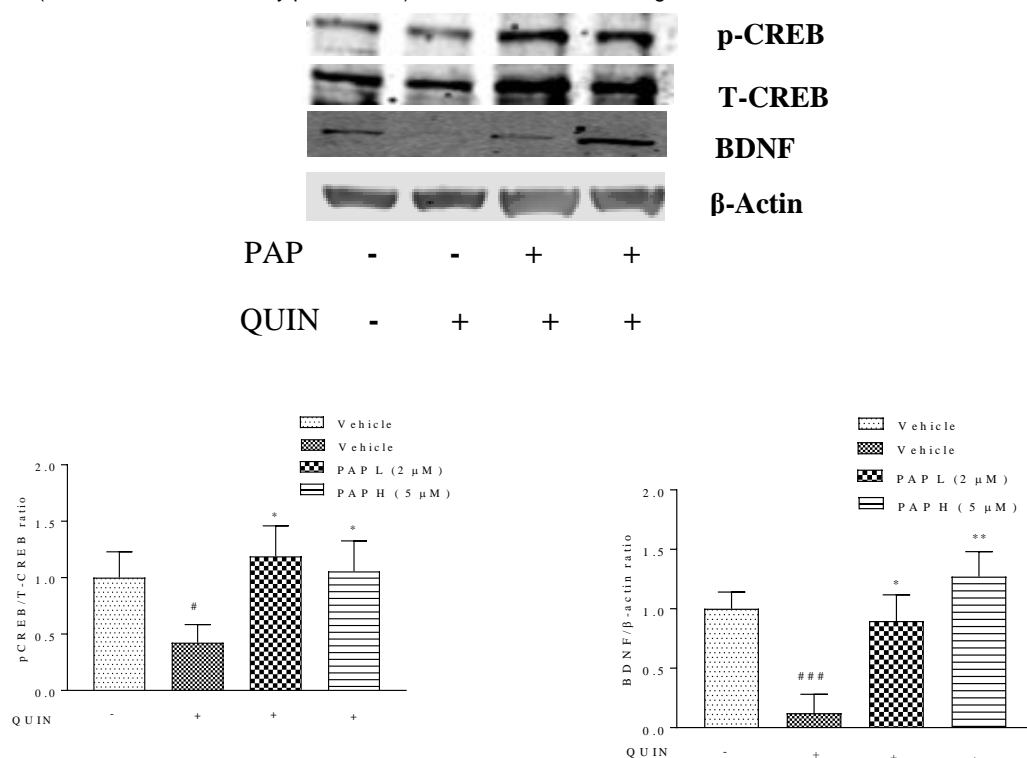

**Figure 7: PAP upregulates the expression of CREB and BDNF in QUIN exposed neurons.**

Neurons were pre-treated with PAP (2 $\mu$ M & 5  $\mu$ M) for 24 hours, followed by 48-hour exposure with QUIN (2 $\mu$ M). (A) Quantification of pCREB/T-CREB. (B) Quantification of BDNF/ $\beta$ -actin. Data are presented as mean  $\pm$  SEM (n = 3) and represent three independent experiments. # denotes  $p < 0.05$ , ### denotes  $p < 0.001$  vs vehicle, \* denotes  $p < 0.05$ , \*\* denotes  $p < 0.01$  vs QUIN exposed neurons

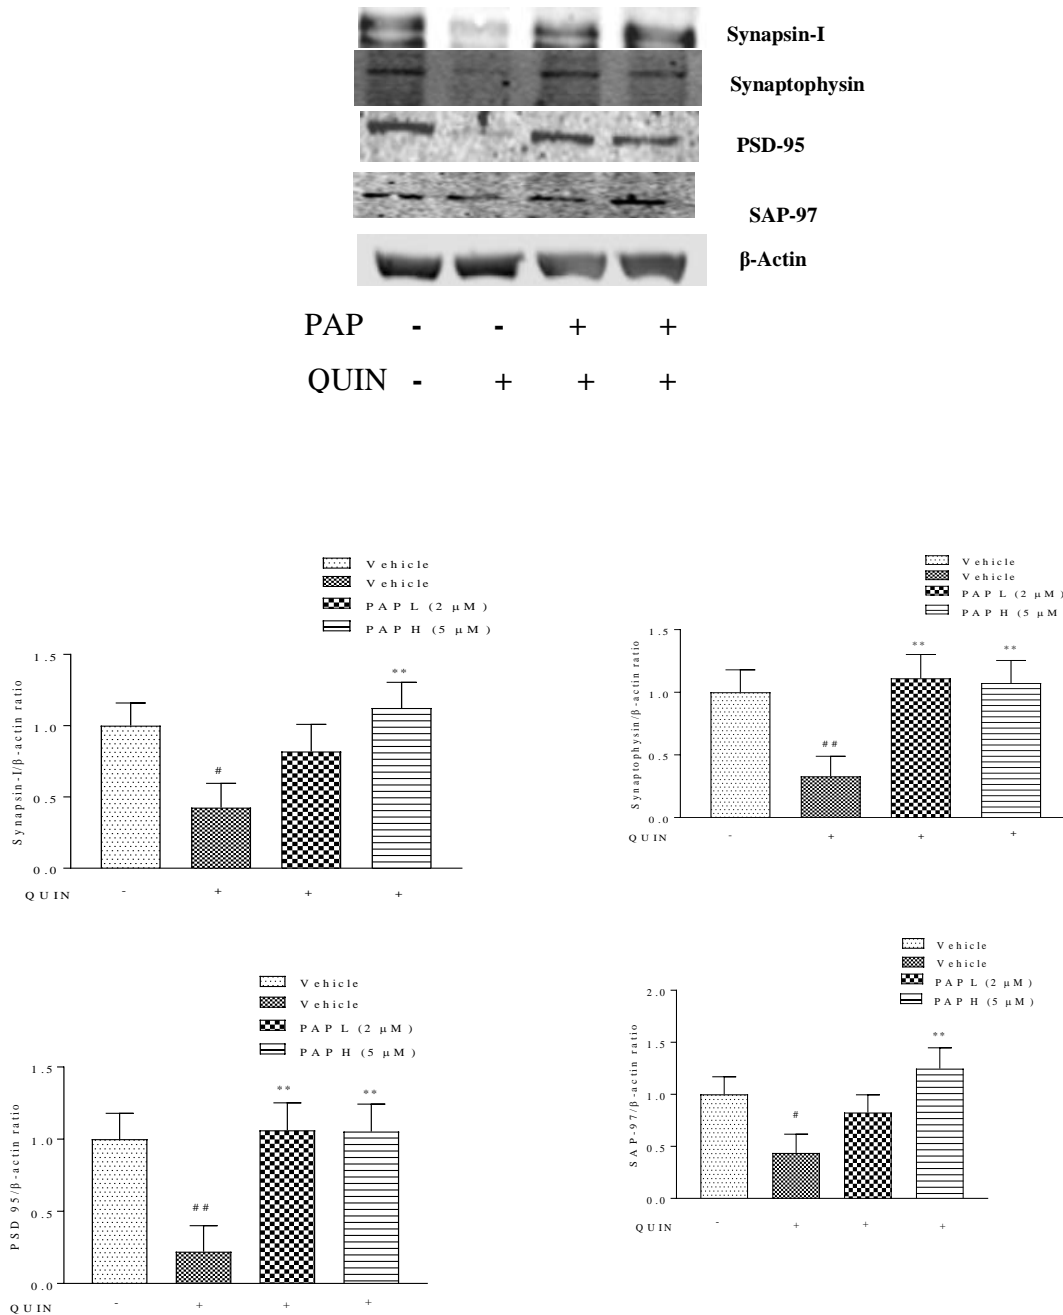

**Figure 9: Papaverine increased the expression of Presynaptic and postsynaptic proteins in QUIN exposed neurons.** Neurons were pre-treated with PAP (2 $\mu$ M & 5  $\mu$ M) for 24 hours, followed by 48-hour exposure with QUIN (2 $\mu$ M). (A) Quantification of Synapsin-I-97/ $\beta$ -actin. (B) Quantification of Synaptophysin/  $\beta$ -actin (C) Quantification of PSD-95/  $\beta$ -actin (D) Quantification of SAP-97/  $\beta$ -actin. Data are presented as mean  $\pm$  SEM (n = 3) and represent three independent experiments. # denotes  $p < 0.05$ , ## denotes  $p < 0.01$  vs vehicle, \*\* denotes  $p < 0.01$  vs QUIN exposed neurons

## Quinolinic Acid Intoxication

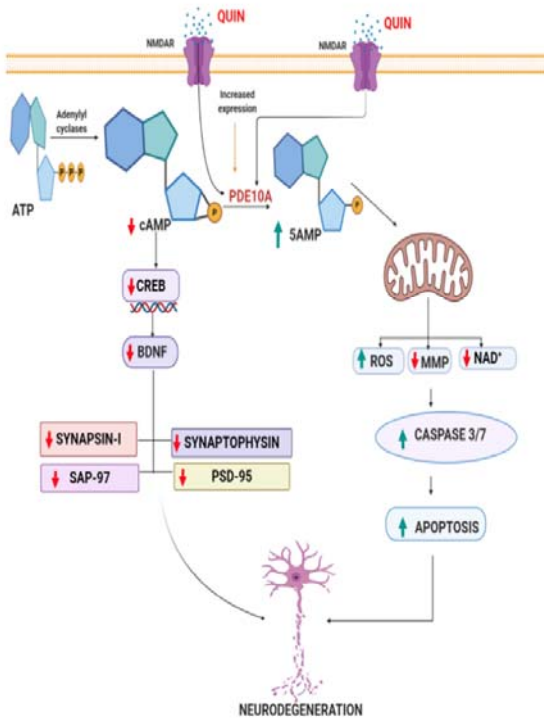

## Papaverine Pre-treated + Quinolinic acid Intoxication

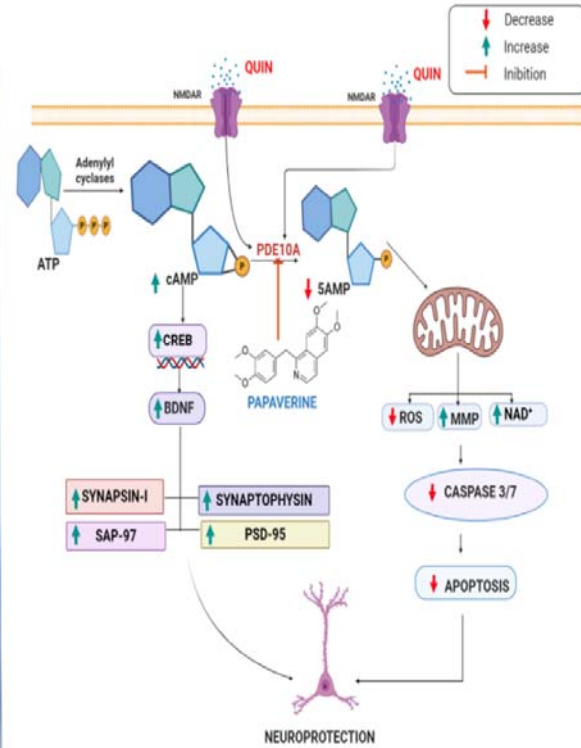

Source: https://biorxiv.org/content/10.1101/2020.12.04.411868v1.full.pdf
